# Supplementary material for: Unveiling the Hidden Responses: Metagenomic Insights into Dwarf Bamboo (Fargesia denudata) Rhizosphere under Drought and Nitrogen Challenges
Source: MDPI journal article supplement (doi:10.3390/ijms251910790), 2024-10-08
Supplement: s1 [file ijms-3195260-supplementary.pdf › ijms-3195260-supplementary.pdf]

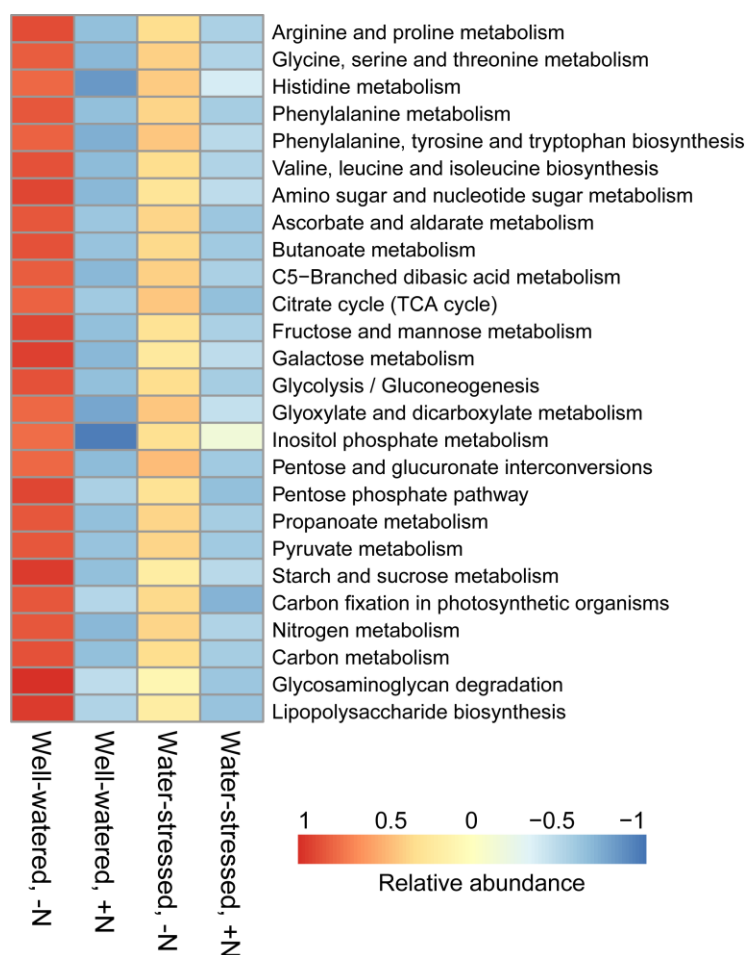

**Figure. S1 KEGG pathway level-3 enrichment analysis**

**Table S1 Relative abundance of microbial species at the phylum level in rhizosphere soil of *Fargesia denudata* under different treatments**

| Phylum                     | Well-watered |              | Water-stressed |              | W  | N  | W×N |
|----------------------------|--------------|--------------|----------------|--------------|----|----|-----|
|                            | -N           | +N           | -N             | +N           |    |    |     |
| <i>Acidobacteria</i>       | 11.02%±1.24a | 10.44%±0.32a | 10.84%±0.64a   | 10.55%±1.51a | ns | ns | ns  |
| <i>Actinobacteria</i>      | 11.3%±1.41b  | 17.35%±0.63a | 15.95%±2.22b   | 16.36%±1.2ab | ns | ns | ns  |
| <i>Bacteroidetes</i>       | 1.19%±0.12a  | 1.23%±0.05a  | 1.23%±0.08a    | 1.17%±0.15a  | ns | ns | ns  |
| <i>Chloroflexi</i>         | 2.38%±0.32a  | 2.48%±0.04a  | 2.58%±0.16a    | 2.69%±0.27a  | ns | ns | ns  |
| <i>Cyanobacteria</i>       | 1.63%±0.23a  | 1.44%±0.02a  | 1.47%±0.11a    | 1.49%±0.2a   | ns | ns | ns  |
| <i>Firmicutes</i>          | 2.36%±0.29a  | 2.18%±0.03a  | 2.24%±0.17a    | 2.27%±0.27a  | ns | ns | ns  |
| <i>Gemmatimonadetes</i>    | 2.02%±0.32a  | 1.86%±0.02a  | 1.89%±0.15a    | 1.76%±0.24a  | ns | ns | ns  |
| <i>Nitrospirae</i>         | 1.69%±2.69a  | 1.68%±0.33a  | 1.53%±3.33a    | 1.45%±3.26a  | ns | ns | ns  |
| <i>Planctomycetes</i>      | 1.66%±0.23a  | 1.59%±0.02a  | 1.59%±0.1a     | 1.57%±0.2a   | ns | ns | ns  |
| <i>Proteobacteria</i>      | 46.83%±0.04a | 43.61%±0.28a | 43.41%±0.17a   | 44.12%±0.17a | ns | ns | ns  |
| <i>Verrucomicrobia</i>     | 3.65%±0.06a  | 3.3%±0a      | 3.23%±0.03a    | 3.65%±0.04a  | ns | ns | ns  |
| <i>Euryarchaeota</i>       | 0.4%±0.21a   | 0.36%±0.02a  | 0.37%±0.14a    | 0.37%±0.23a  | ns | ns | ns  |
| <i>Deinococcus Thermus</i> | 0.33%±0.05a  | 0.31%±0a     | 0.32%±0.02a    | 0.32%±0.04a  | ns | ns | ns  |
| <i>Armatimonadetes</i>     | 3.43%±0.02a  | 3.24%±0a     | 3.29%±0.01a    | 3.35%±0.02a  | ns | ns | ns  |
| <i>Chlorobi</i>            | 9.64%±0.04a  | 6.6%±0a      | 7.49%±0.02a    | 7.72%±0.03a  | ns | ns | ns  |
| others                     | 0.45%±6.13a  | 2.34%±0.29a  | 2.57%±4.51a    | 1.15%±4.35a  | ns | ns | ns  |

Note: different letters represent significant differences among different treatments ( $P < 0.05$ )\*\*\*  $P < 0.001$ ; \*\*  $P < 0.01$ ; \*  $P < 0.05$ ; ns; There was no significant difference ( $P > 0.05$ ).

**Table S2 Effects of Nitrogen (N) Deposition and Drought Stress on microbial communities  
based on PERMANOVA analysis**

|                                      | At the phylum level |                       |          | At the genus level |                       |          |
|--------------------------------------|---------------------|-----------------------|----------|--------------------|-----------------------|----------|
|                                      | <i>F</i>            | <i>R</i> <sup>2</sup> | <i>P</i> | <i>F</i>           | <i>R</i> <sup>2</sup> | <i>P</i> |
| Drought stress                       | 0.134               | 0.013                 | 0.897    | 1.010              | 0.917                 | 0.265    |
| Nitrogen deposition                  | 0.821               | 0.076                 | 0.445    | 1.169              | 0.105                 | 0.006    |
| Drought stress × Nitrogen deposition | 0.748               | 0.219                 | 0.602    | 1.063              | 0.285                 | 0.024    |

**Table S3 Relative abundance of microbial species at the genus level in rhizosphere soil of *Fargesia denudata* under different treatments**

| Genus                  | Well-watered |              | Water-stressed |              | W  | N  | W×N |
|------------------------|--------------|--------------|----------------|--------------|----|----|-----|
|                        | -N           | +N           | -N             | +N           |    |    |     |
| <i>Caballeronia</i>    | 26.9%±0.2a   | 26.07%±0.38a | 26.6%±0.29a    | 26.09%±0.73a | ns | ns | ns  |
| <i>Bradyrhizobium</i>  | 6.44%±0.08ab | 6.41%±0.18b  | 6.22%±0.13b    | 6.73%±0.14a  | ns | *  | *   |
| <i>Rhodoplanes</i>     | 1.96%±0.06a  | 2.08%±0.11ab | 1.86%±0.03b    | 2.04%±0.1a   | ns | ns | ns  |
| <i>Mycobacterium</i>   | 1.63%±0.07b  | 2.89%±0.13a  | 2.26%±0.31a    | 2.48%±0.52a  | ns | ns | ns  |
| <i>Nitrospira</i>      | 1.21%±0.01ab | 1.16%±0.01a  | 1.17%±0.05ab   | 1.07%±0.06ab | ns | *  | ns  |
| <i>Gemmatimonas</i>    | 1.37%±0.04a  | 1.43%±0.01a  | 1.26%±0.05bc   | 1.16%±0.07c  | ** | ns | ns  |
| <i>Chthoniobacter</i>  | 1.01%±0.03a  | 1.1%±0.12ab  | 0.96%±0.01ab   | 1.15%±0.05b  | ns | ns | ns  |
| <i>Streptomyces</i>    | 1.13%±0.01a  | 1.36%±0.03a  | 1.33%±0.1a     | 1.38%±0.12a  | ns | ns | ns  |
| <i>Terrimicrobium</i>  | 1.06%±0.06a  | 2.38%±0.13a  | 2.13%±0.53a    | 2.1%±0.59a   | ns | ns | ns  |
| <i>Solirubrobacter</i> | 0.84%±0.04a  | 0.72%±0.05a  | 0.69%±0.04b    | 0.77%±0.03a  | ns | ns | ns  |
| <i>Pseudolabrys</i>    | 1.05%±0.04a  | 0.78%±0.09a  | 0.82%±0.1ab    | 0.95%±0.1ab  | ns | ns | ns  |
| <i>Burkholderia</i>    | 0.9%±0.03b   | 1.28%±0.04ab | 1.22%±0.14a    | 1.27%±0.16ab | ns | ns | *   |
| <i>Gaiella</i>         | 1.2%±0.01a   | 1.08%±0.01a  | 1.16%±0.06b    | 1.12%±0.05a  | ns | ns | ns  |
| <i>Pyrinomonas</i>     | 0.72%±0.01a  | 0.63%±0.04a  | 0.67%±0.04ab   | 0.63%±0.05a  | ns | ns | ns  |
| <i>Dongia</i>          | 0.58%±0.03ab | 0.48%±0.02b  | 0.60%±0.10ab   | 0.63%±0.09a  | ns | ns | ns  |
| others                 | 52.02%±0.28a | 50.16%±0.28b | 51.06%±0.84ab  | 50.44%±1.03b | ns | *  | ns  |

Note: different letters represent significant differences among different treatments ( $P < 0.05$ )\*\*\*  $P < 0.001$ ; \*\*  $P < 0.01$ ; \*  $P < 0.05$ ; ns; There was no significant difference ( $P > 0.05$ )
